# Supplementary material for: A novel electrochemical detection method for butylated hydroxyanisole (BHA) as an antioxidant: a BHA imprinted polymer based on a nickel ferrite@graphene nanocomposite and its application
Source: Royal Society of Chemistry journal article supplement (doi:10.1039/d3an00814b), 2023-01-01
Supplement: d3an00814b1.pdf [file d3an00814b1.pdf]

## Supplementary Data

For

**A novel electrochemical detection method for butylated hydroxyanisole (BHA) as antioxidant: BHA imprinted polymer based on nickel ferrite@graphene nanocomposite and its application**

Bahar Bankoğlu Yola<sup>a</sup>, Sena Bekerecioğlu<sup>b</sup>, İlknur Polat<sup>b</sup>, Necip Atar<sup>c</sup>, Mehmet Lütfi Yola<sup>b\*</sup>

<sup>a</sup>*Gaziantep Islam Science and Technology University, Faculty of Engineering and Natural Sciences, Department of Engineering Basic Sciences, Gaziantep, Turkey*

<sup>b</sup>*Hasan Kalyoncu University, Faculty of Health Sciences, Department of Nutrition and Dietetics, Gaziantep, Turkey*

<sup>c</sup>*Pamukkale University, Faculty of Engineering, Department of Chemical Engineering, Denizli, Turkey*

\* To whom correspondence should be addressed:

E-mail: [mlutfi.yola@hku.edu.tr](mailto:mlutfi.yola@hku.edu.tr)

Tel.: +903422118080 Fax: +903422118081

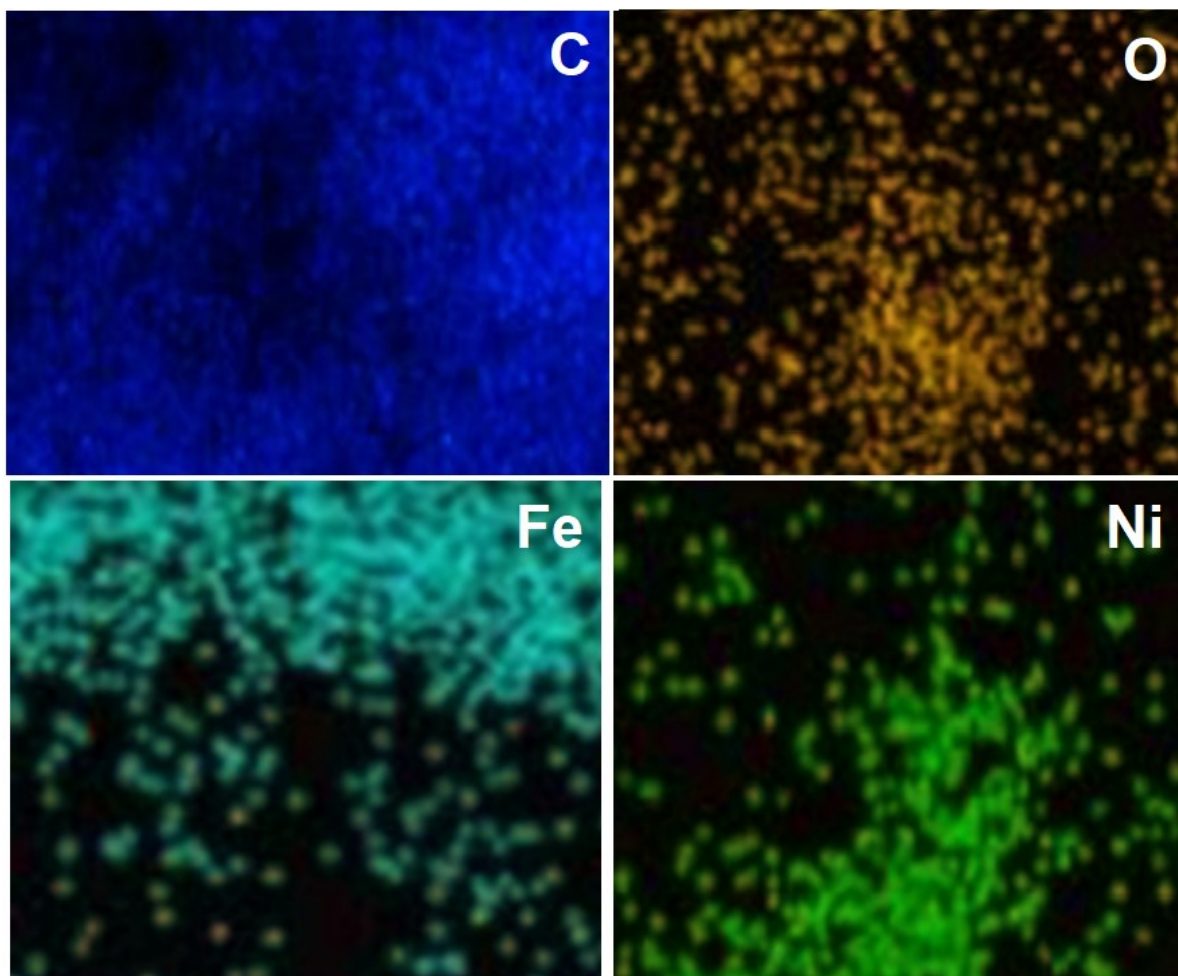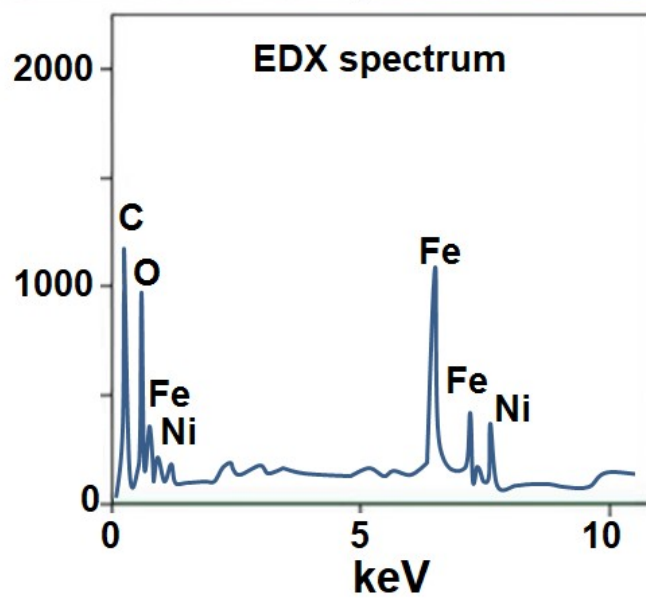

**Fig. S1.** EDS elemental distribution and EDX spectrum of  $\text{NiFe}_2\text{O}_4@\text{Gr}(0.6)$

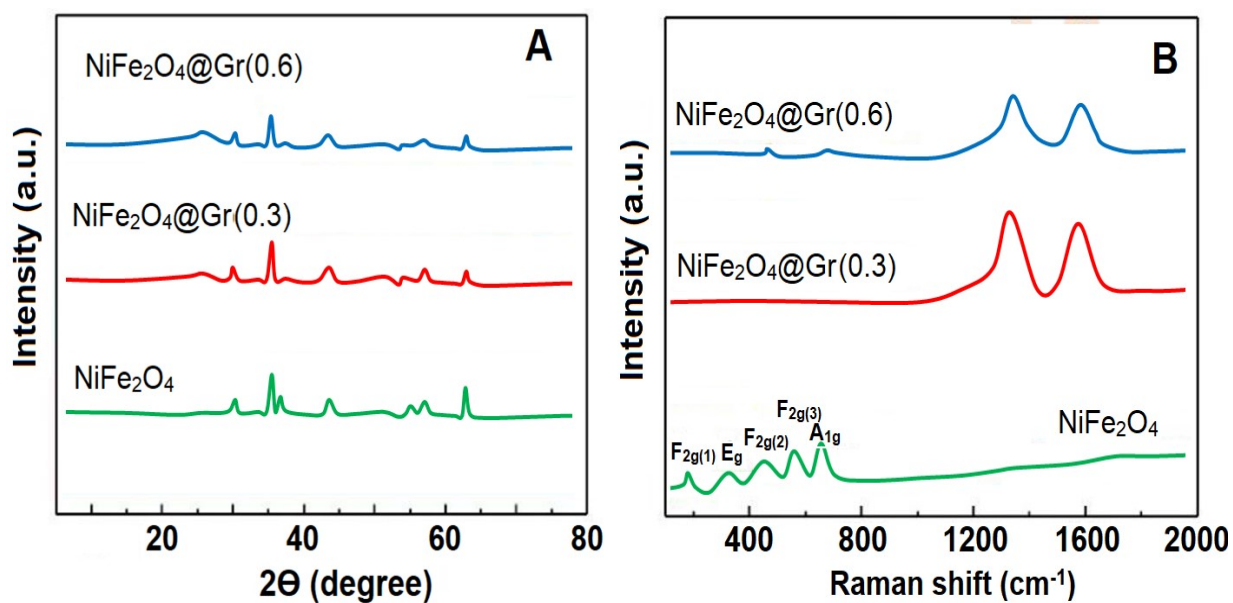

Fig. S2. (A) XRD patterns and (B) Raman spectra of NiFe<sub>2</sub>O<sub>4</sub>, NiFe<sub>2</sub>O<sub>4</sub>@Gr(0.3) and NiFe<sub>2</sub>O<sub>4</sub>@Gr(0.6)

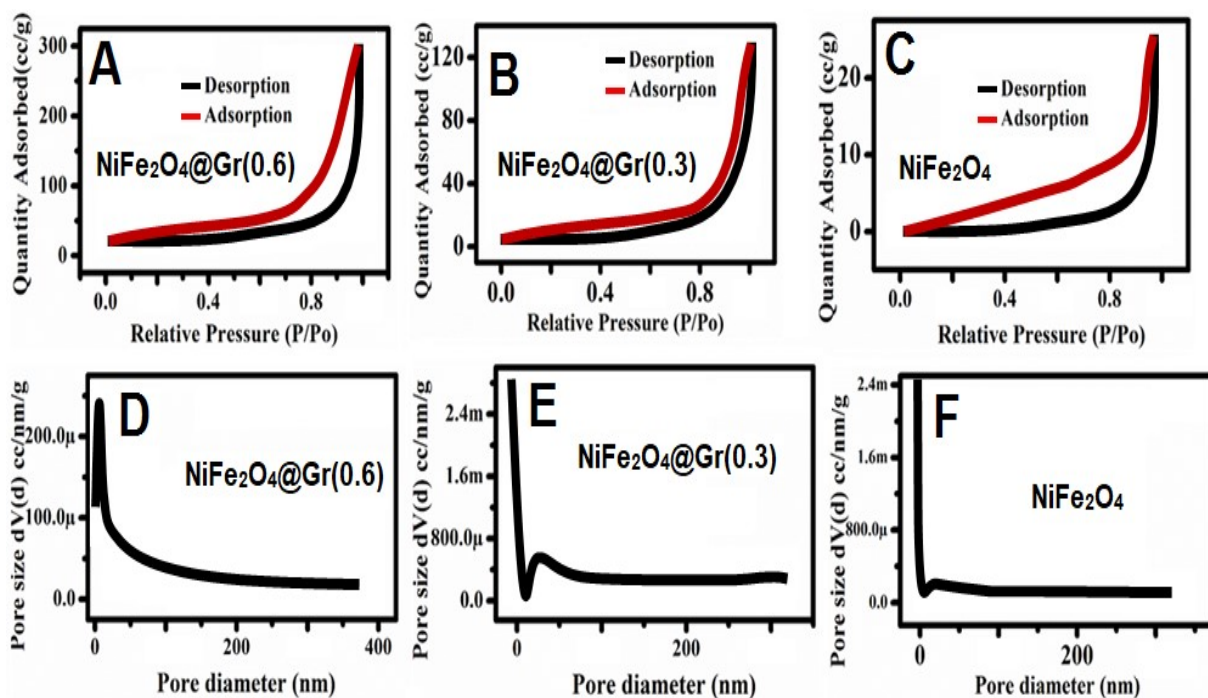

Fig. S3. (A), (B), (C) N<sub>2</sub> adsorption-desorption isotherms of NiFe<sub>2</sub>O<sub>4</sub>, NiFe<sub>2</sub>O<sub>4</sub>@Gr(0.3) and NiFe<sub>2</sub>O<sub>4</sub>@Gr(0.6), and (D), (E), (F) pore size distribution isotherms

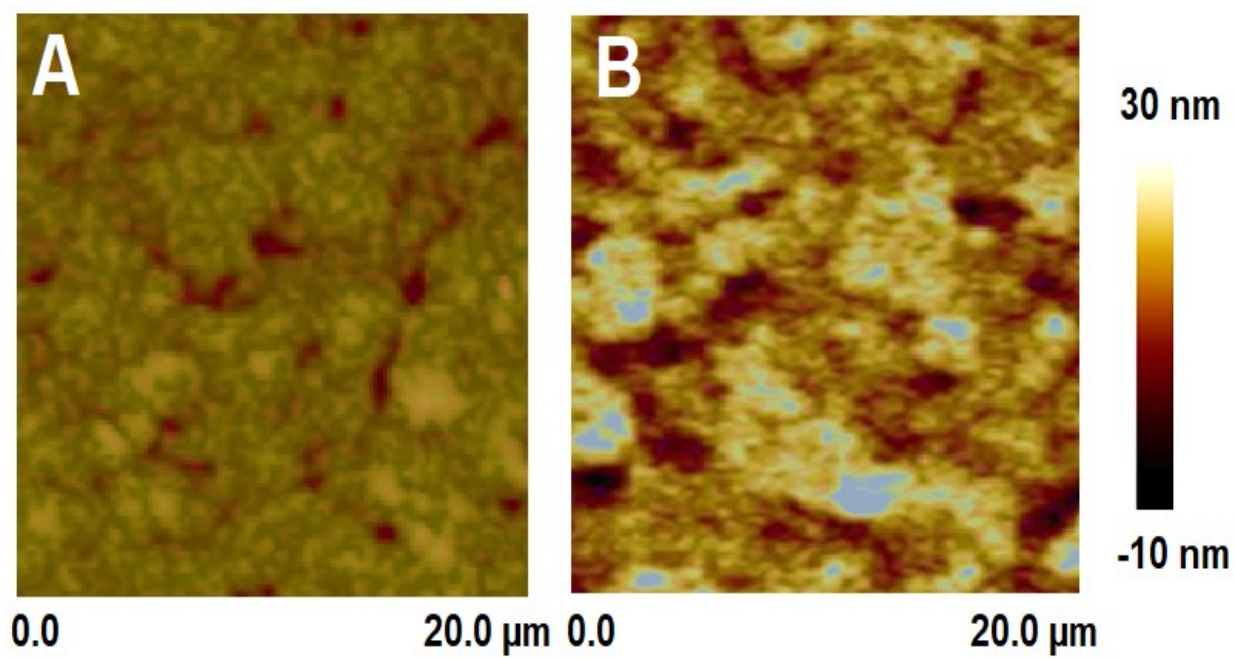

**Fig. S4.** AFM images of (A) bare GCE and (B)  $\text{NiFe}_2\text{O}_4@\text{Gr}(0.6)/\text{GCE}$

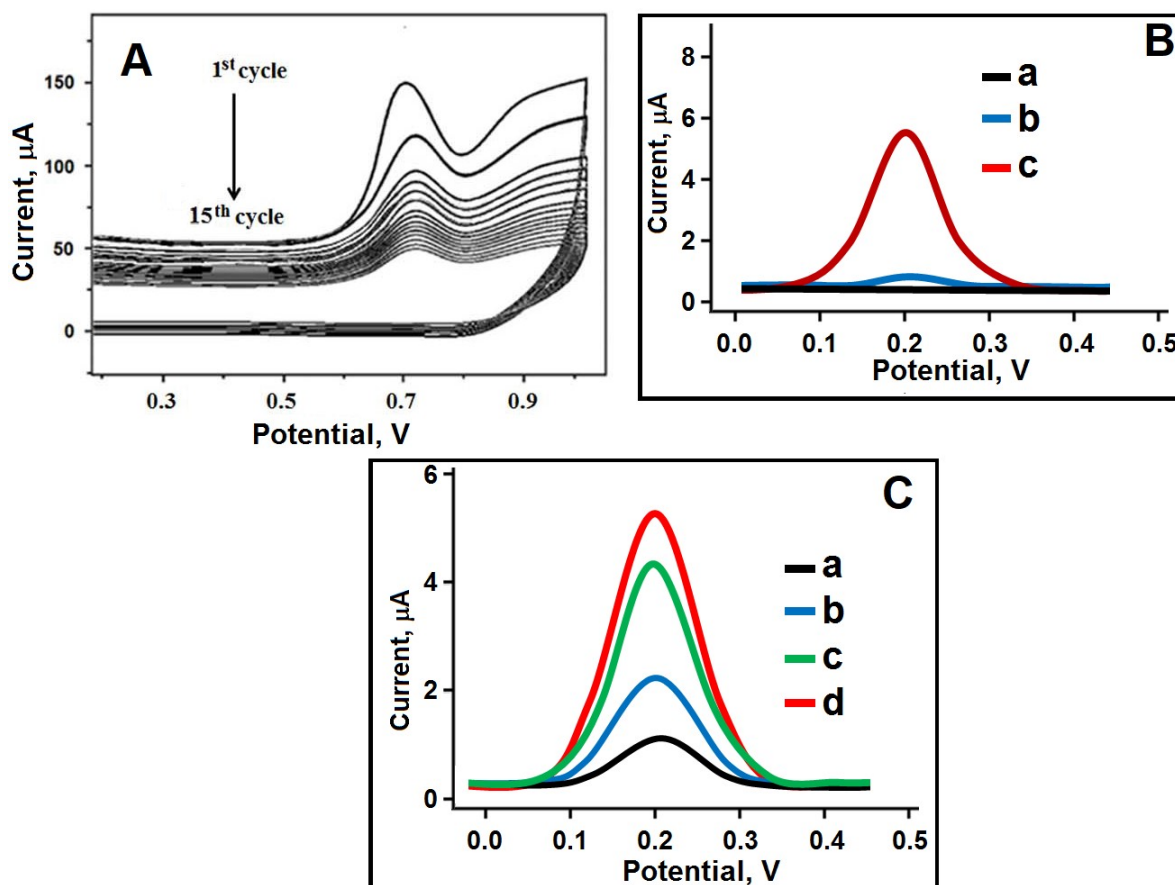

**Fig. S5.** (A) 100.0 mM Py polymerization containing 25.0 mM BHA on NiFe<sub>2</sub>O<sub>4</sub>@Gr(0.6)/GCE (Scan rate: 100 mV s<sup>-1</sup>), (B) DPVs of the prepared electrodes in this study: (a) MIP/NiFe<sub>2</sub>O<sub>4</sub>@Gr(0.6) in blank buffer solution (pH 7.0), (b) NIP/NiFe<sub>2</sub>O<sub>4</sub>@Gr(0.6) after rebinding of 0.5 nM BHA in 0.1 M PBS (pH 7.0), (c) MIP/NiFe<sub>2</sub>O<sub>4</sub>@Gr(0.6) after rebinding of 0.5 nM BHA in 0.1 M PBS (pH 7.0), (C) DPVs of different molecularly imprinting electrodes after rebinding of 0.5 nM BHA in 0.1 M PBS (a) MIP/bare GCE, (b) MIP/NiFe<sub>2</sub>O<sub>4</sub>/GCE, (c) MIP/NiFe<sub>2</sub>O<sub>4</sub>@Gr(0.3)/GCE and (d) MIP/NiFe<sub>2</sub>O<sub>4</sub>@Gr(0.6)/GCE

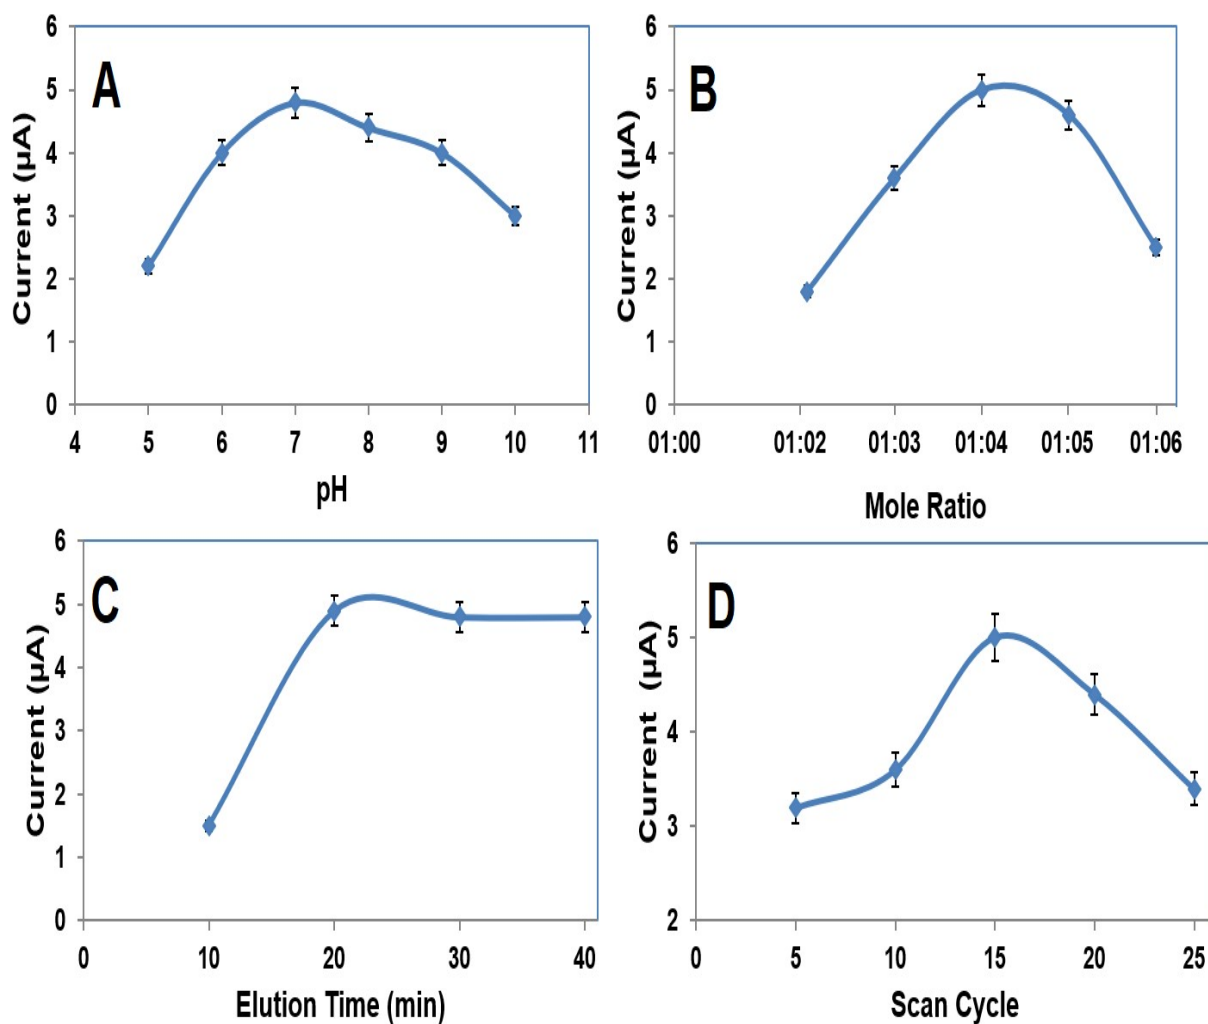

**Fig. S6.** Effect of (A) pH, (B) mole ratio, (C) desorption time, (D) scan cycle on signals of DPVs (in presence of 0.5 nM BHA) (n = 6)

**Table S1.** Recovery results of BHA in flour (n=6)

| Sample | Added BHA (nM) | Found BHA (nM) | *Recovery (%) |
|--------|----------------|----------------|---------------|
| Flour  | -              | 0.273 ± 0.002  | -             |
|        | 0.100          | 0.374 ± 0.002  | 100.27 ± 0.01 |
|        | 0.300          | 0.572 ± 0.005  | 99.83 ± 0.06  |
|        | 0.500          | 0.772 ± 0.003  | 99.87 ± 0.04  |

\*Recovery = Found BHA, nM / Real BHA, nM

**Table S2.**  $k$  and  $k'$  values of BHA imprinted electrodes (MIP/NiFe<sub>2</sub>O<sub>4</sub>@Gr(0.6)/GCE and NIP/NiFe<sub>2</sub>O<sub>4</sub>@Gr(0.6)/GCE)

|     | MIP                    |       | NIP                    |       | $k'$ |
|-----|------------------------|-------|------------------------|-------|------|
|     | $\Delta I$ ( $\mu A$ ) | $k$   | $\Delta I$ ( $\mu A$ ) | $k$   |      |
| BHA | 5.20                   | -     | 0.50                   | -     | -    |
| BHT | 0.50                   | 10.40 | 0.30                   | 1.67  | 6.23 |
| PHE | 0.40                   | 13.00 | 0.20                   | 2.50  | 5.20 |
| AA  | 0.30                   | 17.33 | 0.10                   | 5.00  | 3.47 |
| CA  | 0.20                   | 26.00 | 0.05                   | 10.00 | 2.60 |

Analyte concentrations: 0.5 nM BHA, 100.0 nM BHT, 100.0 nM PHE, 100.0 nM AA, 100.0 nM CA

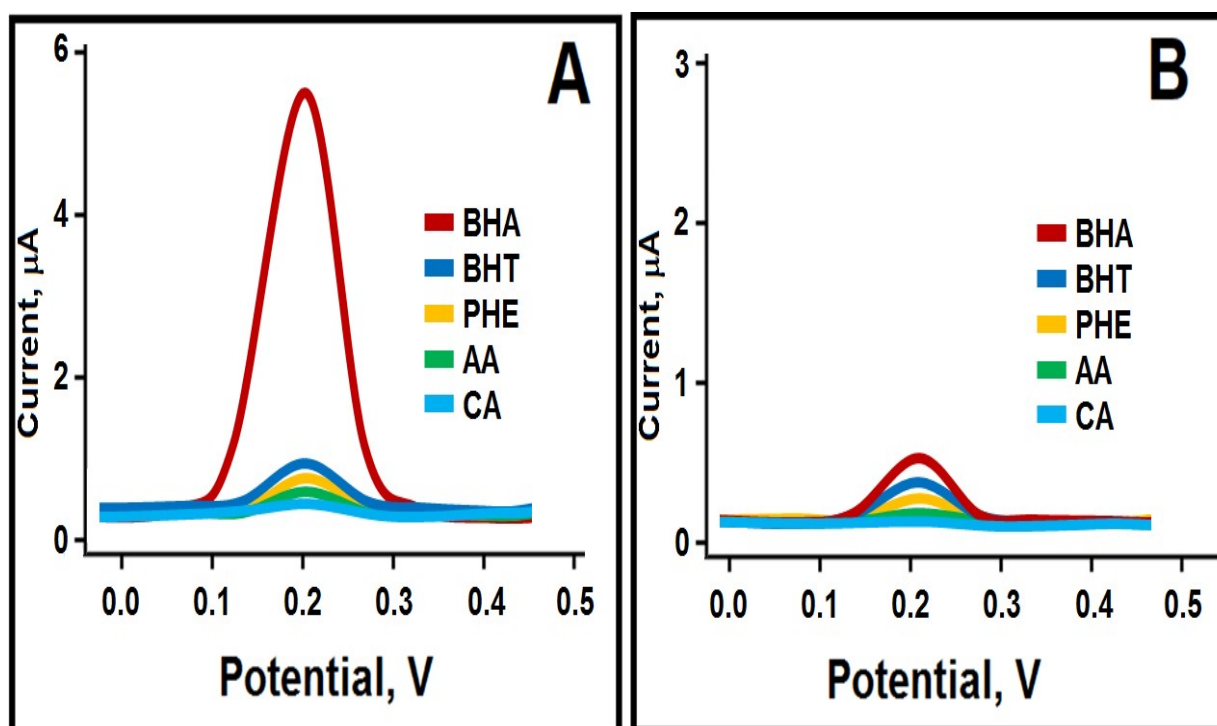

**Fig. S7.** DPVs of (A) MIP/NiFe<sub>2</sub>O<sub>4</sub>@Gr(0.6)/GCE and (B) NIP/NiFe<sub>2</sub>O<sub>4</sub>@Gr(0.6)/GCE in 0.5 nM BHA, 100.0 nM BHT, 100.0 nM PHE, 100.0 nM AA, 100.0 nM CA

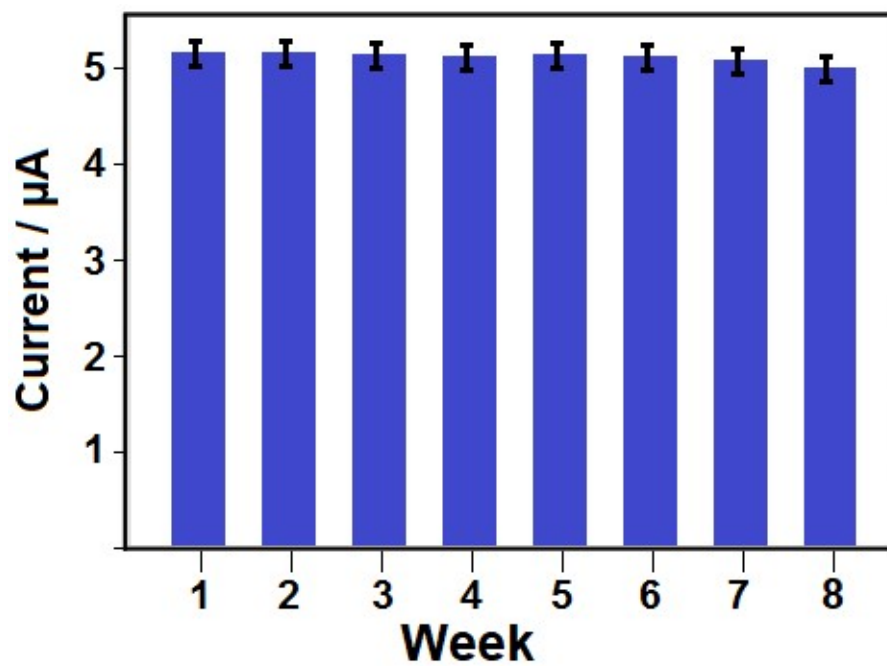

**Fig. S8.** Stability test of MIP/NiFe<sub>2</sub>O<sub>4</sub>@Gr(0.6)/GCE including 0.5 nM BHA (n = 6)
